# Supplementary material for: PHF20L1 as a H3K27me2 reader coordinates with transcriptional repressors to promote breast tumorigenesis
Source: PubMed Central journal article supplement — Sci Adv. 2020 Apr 15;6(16):eaaz0356. doi: 10.1126/sciadv.aaz0356 (PMC7159910; doi:10.1126/sciadv.aaz0356), 2020-04-15
Supplement: aaz0356_SM.pdf [file aaz0356_SM.pdf]

[advances.sciencemag.org/cgi/content/full/6/16/eaaz0356/DC1](https://advances.sciencemag.org/cgi/content/full/6/16/eaaz0356/DC1)

## Supplementary Materials for

### **PHF20L1 as a H3K27me2 reader coordinates with transcriptional repressors to promote breast tumorigenesis**

Yongqiang Hou, Wei Liu, Xianfu Yi, Yang Yang, Dongxue Su, Wei Huang, Hefen Yu, Xu Teng, Ying Yang, Wei Feng, Tao Zhang, Jie Gao, Kai Zhang, Rongfang Qiu, Yan Wang\*

\*Corresponding author. Email: [yanwang@tmu.edu.cn](mailto:yanwang@tmu.edu.cn)

Published 15 April 2020, *Sci. Adv.* **6**, eaaz0356 (2020)  
DOI: 10.1126/sciadv.aaz0356

#### **This PDF file includes:**

Supplementary Materials and Methods  
Tables S1 to S4  
Figs. S1 to S6

## **Supplementary Materials and Methods**

### **EdU assays**

Briefly, breast cancer cells were incubated with EdU in medium (50 mM) for 2 h. Then, the cells were fixed in 4% paraformaldehyde for 10 min, permeabilized with 0.5% triton-X-100, and stained with Alexa Fluor® 488, according to the manufacturer's instructions of the Click-iT® EdU Alexa Fluor® 488 imaging Kit (Life Technologies). Then, cells were stained with DAPI (Sigma-Aldrich). Photographs of the cells were scanned independently using a multi-tracking mode with an OLYMPUS confocal microscope. EdU<sup>+</sup> cells were identified by ImagePro Plus software.

### **Cell flow cytometry**

MDA-MB-231 cells transfected with siRNA against PHF20L1 were synchronized using thymidine blockade for 12 h and then released for 12 h. After that, cells were blocked for another 12 h and released with 10% FBS for an appropriate period. Cells were then trypsinized, washed with PBS, and fixed in 70% ethanol at 4°C overnight. After washing with PBS, cells were incubated with RNase A (Sigma) in PBS for 30 min at 37°C and then stained with 50 mg/ml propidium iodide (PI). Cell cycle data were collected using FACS Calibur (Becton Dickinson) and analyzed with ModFit LT 3.0 (Verity Software House Inc., Topsham, ME).

### **FPLC chromatography**

HEK293T cells or HEK293T cells stably expressing FLAG-tagged PHF20L1 were washed twice with cold PBS, scraped, and collected by centrifugation at 1500 × *g* for 5 min. Nuclear and cytoplasmic proteins were extracted using a nuclear-cytosol extraction kit (Applygen Technologies Inc, Beijing, China). The supernatant (nuclear fraction) was collected by centrifugation at 13,000 × *g* for 30 min at 4°C. The protein concentration was determined using a BCA Pierce protein assay kit (Thermo Scientific), and 6 mg of nuclear proteins or FLAG-tagged PHF20L1-coupled proteins were used for the FPLC assay. The proteins were concentrated to 1 ml using a Millipore Ultra free centrifugal filter apparatus (10 kDa nominal molecular mass limit), and then applied to an 850 x 20 mm Superose size 6 exclusion column (Amersham Biosciences) that had been equilibrated with buffer D containing 1 mM dithiothreitol and calibrated with protein standards (blue dextran, 2,000 kDa; thyroglobulin, 669 kDa; ferritin, 440 kDa; catalase, 232 kDa; bovine serum albumin, 67 kDa; and RNase A, 13.7 kDa, all from Amersham Biosciences). The column was eluted at a flow rate of 0.5 ml/min and fractions were collected for further western blotting analysis.

**Supplementary Table S1. Mass spectrometry results of PHF20L1-containing protein complex in HEK293T cell.**

| Description   | Score   | Coverage | Proteins | Unique Peptides | Peptides | PSMs | AAs  |
|---------------|---------|----------|----------|-----------------|----------|------|------|
| PHF20L1       | 1229.50 | 38.64    | 7        | 3               | 39       | 337  | 1017 |
| Mi-2 $\beta$  | 905.69  | 25.88    | 8        | 47              | 55       | 334  | 1905 |
| MTA2          | 645.63  | 52.99    | 2        | 28              | 33       | 226  | 668  |
| GATAD2A       | 447.86  | 57.66    | 13       | 26              | 28       | 139  | 633  |
| GATAD2B       | 369.55  | 53.79    | 1        | 28              | 30       | 115  | 593  |
| MTA1          | 338.35  | 55.30    | 13       | 25              | 31       | 120  | 698  |
| RBBP4         | 320.74  | 31.95    | 17       | 6               | 13       | 100  | 410  |
| RBBP7         | 301.26  | 37.18    | 7        | 1               | 14       | 90   | 425  |
| HDAC2         | 259.74  | 28.82    | 17       | 6               | 11       | 96   | 458  |
| Mi-2 $\alpha$ | 255.28  | 13.15    | 6        | 17              | 25       | 114  | 2000 |
| HDAC1         | 228.57  | 29.05    | 8        | 8               | 13       | 86   | 482  |
| MTA3          | 195.26  | 37.16    | 8        | 11              | 19       | 70   | 514  |
| MBD3          | 173.79  | 50.52    | 5        | 18              | 18       | 65   | 291  |
| MTA2          | 44.66   | 11.23    | 2        | 5               | 7        | 21   | 668  |
| EED           | 6.72    | 8.00     | 4        | 3               | 3        | 3    | 400  |
| SUZ12         | 4.97    | 3.07     | 2        | 2               | 2        | 2    | 716  |
| EZH2          | 2.12    | 1.46     | 5        | 1               | 1        | 1    | 707  |

**Supplemental Table S2. Mass spectrometry results of PHF20L1-containing protein complex in MDA-MB-231 cell.**

| Description   | Score  | Coverage | Proteins | Unique Peptides | Peptides | PSMs | AAs  |
|---------------|--------|----------|----------|-----------------|----------|------|------|
| PHF20L1       | 441.45 | 52.21    | 7        | 3               | 55       | 211  | 1017 |
| Mi-2 $\beta$  | 79.38  | 25.20    | 5        | 24              | 31       | 42   | 1905 |
| MTA2          | 68.74  | 32.49    | 2        | 14              | 18       | 44   | 668  |
| GATAD2A       | 60.62  | 41.45    | 13       | 13              | 15       | 33   | 633  |
| GATAD2B       | 96.41  | 53.63    | 1        | 17              | 19       | 46   | 593  |
| MTA1          | 66.92  | 33.52    | 10       | 14              | 20       | 35   | 698  |
| RBBP4         | 115.03 | 54.10    | 12       | 8               | 11       | 33   | 410  |
| RBBP7         | 105.94 | 56.00    | 7        | 9               | 12       | 32   | 425  |
| HDAC2         | 124.52 | 48.57    | 15       | 10              | 16       | 53   | 458  |
| Mi-2 $\alpha$ | 16.16  | 9.30     | 6        | 7               | 12       | 14   | 2000 |
| HDAC1         | 114.12 | 36.31    | 6        | 7               | 13       | 50   | 482  |
| MTA3          | 31.68  | 27.24    | 8        | 6               | 12       | 22   | 514  |
| MBD3          | 24.21  | 41.58    | 3        | 10              | 11       | 26   | 291  |
| MTA2          | 68.74  | 32.49    | 2        | 14              | 18       | 44   | 668  |
| EED           | 5.80   | 12.67    | 6        | 4               | 4        | 5    | 400  |
| SUZ12         | 6.00   | 4.55     | 2        | 3               | 3        | 4    | 716  |
| EZH2          | 6.09   | 2.31     | 10       | 2               | 2        | 3    | 707  |

**Supplemental Table S3. siRNA and shRNA sequences.**

| siRNA sequences |                      |
|-----------------|----------------------|
| PHF20L1#1       | CUAUUACCCUGCCAAGAUAU |
| PHF20L1#2       | UUGGACAGACUGUCGCUAU  |
| PHF20L1#3       | GCAAGAAUCUUCAGUACCA  |
| SETDB1#1        | CCCGAGGCUUUGCUCUUA   |
| SETDB1#2        | GCUGAGACACCAAACGUCA  |
| TDRKH#1         | UUAGAGGUUCCCUGAUUAU  |
| TDRKH#2         | GUACACAAAGGAUACGCAA  |
| FXR1#1          | CGAGCUGAGUGAUUGGUCA  |
| FXR1#2          | GAAACGGAAUCUGAGCGUA  |
| LBR#1           | UGAUUGGAUGGGUGGUUAU  |
| LBR#2           | AGCGUGUGCCCUACCGUAU  |
| KDM4C#1         | GCUUGAAUCUCCCAAGUAU  |
| KDM4C#2         | CAAAGUAUCUUGGAUCAA   |
| SND1#1          | GGUACCAUCCUUCAUCCAA  |
| SND1#2          | GGACAAGGCCGCAACUUU   |
| FMR1#1          | GUUUGGAGAGAUUACAAAU  |
| FMR1#2          | GCGUUUGGAGAGAUUACAA  |
| UHRF2#1         | CGUCUCUUCUCCAUUACA   |
| UHRF2#2         | GUAAUGUGGCUUAUCAUAU  |
| PHF19#1         | CUCGUGACUUUCGAAGUAU  |
| PHF19#2         | CCUCGUGACUUUCGAAGAU  |
| MSL3#1          | CAGUGAAUAUUCGUGGAA   |
| MSL3#2          | CCAGUCCGCCUUUGUUGAA  |
| KDM4A#1         | GUUGAGGAUGGUCUUAACCU |

| siRNA sequences |                      |
|-----------------|----------------------|
| KDM4A#2         | GGACUUAGCUUCAUAACUA  |
| SMNDC1#1        | GCCAGGUAAAGAGGAGUAU  |
| SMNDC1#2        | GAAAGUGAAAUGGCAACAA  |
| UHRF1#1         | GGUCA AUGAGUACGUCGAU |
| UHRF1#2         | CUUUGAUUCGUUCCUUCUU  |
| TDRD6#1         | GUUUAGGCAGCUACCAAUA  |
| TDRD6#2         | AGUGCACCCUGGCUGAUAU  |
| ARID4B#1        | AGAUAGAGGUACACCUAUU  |
| ARID4B#2        | ACCUUAGGGUGGCUUUAAU  |
| MYC#1           | ACUCGGUGCAGCCGUAUUU  |
| MYC#2           | CCUGAGACAGAUCAGCAAC  |
| MYC#3           | CAGGAACUAUGACCUCGAC  |
| MYC#4           | CCCAAGGUAGUUAUCCUUA  |
| MTA1#1          | UCACGGACAUUCAGCAAGA  |
| MTA1#2          | GGACCAAACCGCAGUAACA  |
| EZH2#1          | CGGCUCCUCUAACCAUGUU  |
| EZH2#2          | CCCAACAUAGAUGGACCAA  |
| shRNA sequences |                      |
| shPHF20L1       | CTATTACCCTGCCAAGATT  |
| shEZH2          | GAGCTCCTCTGAAGCAAAT  |
| shMTA1          | TCACGGACATTCAGCAAGA  |

**Supplemental Table S4. The primers used in qRT-PCR and qChIP.**

| <b>qRT-PCR primers</b> |              |                                 |                                 |
|------------------------|--------------|---------------------------------|---------------------------------|
| <b>Species</b>         | <b>Genes</b> | <b>Forward Primer Sequences</b> | <b>Reverse Primer Sequences</b> |
| human                  | PHF20L1      | GGGCAAGATGTTGGTCCATTT           | TCTCAAGGGGTCGCAATCTAT           |
| human                  | ACTB         | CATGTACGTTGCTATCCAGGC           | CCTTATCAAGATGCGAACTCACA         |
| human                  | SETDB1       | AGGAACTTCGGCATTTCATCG           | TGTCCCGGTATTGTAGTCCCA           |
| human                  | TDRKH        | TCTACTGAACGGACTTCTTGGA          | CTGCTTCCCTATACCTGCGG            |
| human                  | FXR1         | GAGAAGACGGTATGGTTCATTT          | AGGCGTTCATTCTTAGCTGT            |
| human                  | LBR          | CGAGGGAGTCGATCAAGGTCA           | CTTCAGAATCAGCGGAGTCAAT          |
| human                  | KDM4C        | CATGGAGTCTAAAGGAGCCCA           | TGTAAGTGAACAGTCCTGA             |
| human                  | SND1         | CCTGAGCGGCAGATCAACC             | AGGTAGATCATGCCATACTCTCG         |
| human                  | FMR1         | TATGCAGCATGTGATGCAACT           | TTGTGGCAGGTTTGTGGGAT            |
| human                  | UHRF2        | ATTGAGGACGTGTCTCGCAA            | GGTCTGGGCGAACTAGCAG             |
| human                  | PHF19        | ACTCGGGACTCCTATGGTGC            | CCTCCGTCAGTTTGGACATCA           |
| human                  | MSL3         | AACAGGAGGAAACGGTTAGTGA          | TGTGGCATAACGTGATGGTGA           |
| human                  | KDM4A        | ATCCCAGTGCTAGGATAATGACC         | ACTCTTTTGGAGGAACAACCTTG         |
| human                  | SMNDC1       | AGCGGAGATTGAGGAGATAGATG         | GGTTCAACAGTGGAGTCACTTC          |
| human                  | UHRF1        | GCCATACCCTCTTCGACTACG           | GCCCCAATTCCGTCTCATCC            |
| human                  | MTF2         | GTCCACCTGGCCCATATACAA           | CCGTGAAATCCACATCTGAGG           |
| human                  | TDRD6        | GACGTGCATCCCGATGTGAT            | AGCAGGAAGACACGGCTCT             |
| human                  | BRCA1        | GAAACCGTGCCAAAAGACTTC           | CCAAGGTTAGAGAGTTGGACAC          |
| human                  | RASSF1       | AGGACGGTTCTTACACAGGCT           | TGGGCAGGTAAAAGGAAGTGC           |
| human                  | FBXW7        | GGCCAAAATGATTCCCAGCAA           | ACTGGAGTTCGTGACACTGTTA          |
| human                  | KISS1        | AGCAGCTAGAATCCCTGGG             | AGGCCGAAGGAGTTCAGT              |
| human                  | HIC1         | GTCGTGCGACAAGAGCTACAA           | CGTTGCTGTGCGAACTTGC             |
| human                  | LDHA         | ATGGCAACTCTAAAGGATCAGC          | CCAACCCCAACAACCTGTAATCT         |
| human                  | PGK1         | TGGACGTAAAGGGAAGCGG             | GCTCATAAGGACTACCGACTTGG         |
| human                  | SIRT1        | TAGCCTTGTCAGATAAGGAAGGA         | ACAGCTTCACAGTCAACTTTGT          |
| human                  | ENO1         | AAAGCTGGTGCCGTTGAGAA            | GGTTGTGGTAAACCTCTGCTC           |
| human                  | PKM          | ATGTCGAAGCCCATAGTGAA            | TGGGTGGTGAATCAATGTCCA           |
| human                  | MYC          | GGCTCCTGGCAAAAAGGTCA            | CTGCGTAGTTGTGCTGATGT            |
| human                  | MTA1         | ACGCAACCCTGTCAGTCTG             | GGGCAGGTCCACCATTTC              |

| <b>qRT-PCR primers</b> |              |                                 |                                 |
|------------------------|--------------|---------------------------------|---------------------------------|
| <b>Species</b>         | <b>Genes</b> | <b>Forward Primer Sequences</b> | <b>Reverse Primer Sequences</b> |
| human                  | EZH2         | AATCAGAGTACATGCGACTGAGA         | GCTGTATCCTTCGCTGTTTCC           |
| human                  | TUBB         | TGGACTCTGTTCGCTCAGGT            | TGCCTCCTTCCGTACCACAT            |
| mouse                  | Phf20l1      | CGTCCTGGAATCACTTTTGAGA          | TTGCTGTCCCAGTAAATCCAC           |
| mouse                  | Ldha         | CAAAGACTACTGTGTAACTGCGA         | TGGACTGTACTTGACAATGTTGG         |
| mouse                  | Pgk1         | ATGTCGCTTTCCAACAAGCTG           | GCTCCATTGTCCAAGCAGAAT           |
| mouse                  | Gapdh        | AGGTCGGTGTGAACGGATTTG           | GGGGTCGTTGATGGCAACA             |
| mouse                  | Eno1         | TGCGTCCACTGGCATCTAC             | CAGAGCAGGCGCAATAGTTTTA          |
| mouse                  | Hk2          | ATGATCGCCTGCTTATTCACG           | CGCCTAGAAATCTCCAGAAGGG          |
| mouse                  | Sirt1        | TGATTGGCACCGATCCTCG             | CCACAGCGTCATATCATCCAG           |
| mouse                  | Pkm          | CGCCTGGACATTGACTCTG             | GAAATTCAGCCGAGCCACATT           |
| <b>qChIP primers</b>   |              |                                 |                                 |
| <b>Species</b>         | <b>Genes</b> | <b>Forward Primer Sequences</b> | <b>Reverse Primer Sequences</b> |
| human                  | PHF20L1#1    | CAAGTGTCATTATTGGAAGACC          | CAGTATTCAAGTTTCTGATGGT          |
| human                  | PHF20L1#2    | GAGGCTAGAACTTTAGCTGCAA          | CTATGGAGATTTGGGTGCTGGA          |
| human                  | PHF20L1#3    | ACCTGGATGGTAGAGCAG              | TAAAATGTAATTAGAAGTGAGA          |
| human                  | PHF20L1#4    | TGCTCAGTCTAGCTCAGTAGCT          | TTTTCTCTTGGTTTCCACTGTA          |
| human                  | PHF20L1#5    | GTTTGGGAGGGTAGGTAT              | TATTACTAAGATGTGTGTACGC          |
| human                  | PHF20L1#6    | AGTTTGCCAAGGGTCCTG              | GGTACTGGAGGAAAGAACG             |
| human                  | BRCA1        | GGGGATTGGGACCTCTTC              | TCTACCTGAGTTTGCCATAAAG          |
| human                  | GATA2        | CAATTACCGACTGTCAATCCCG          | TCCTCCAGCCCTCTTCCT              |
| human                  | GSTM2        | TGAATCCCTGAGCACCAA              | CCGCTGCACTCTAGGTTAG             |
| human                  | HIC1         | GGGCAGGACTTTTCCGAACT            | CCTACCCGCAGGTTCCGCC             |
| human                  | KISS1        | ACATTTCACTGACACTTCT             | GGACTTTCTCCTTCTTACCG            |
| human                  | STMN3        | CAGACCTGGACCCTGTTGG             | AGATGAGCCCCATTCCCA              |
| human                  | VILL         | AAGTGCCAAGACATAACAA             | GTTCAAGTGATCTTCCCGCT            |
| human                  | ZNF512B      | GGATGCGGCGGAATCAGGT             | CGCTGGCCTGTGGTTCCC              |
| human                  | ACTB         | CCAGCACCCCAAGGCG                | GGCTTCGCCGCACAGT                |



fig. S1

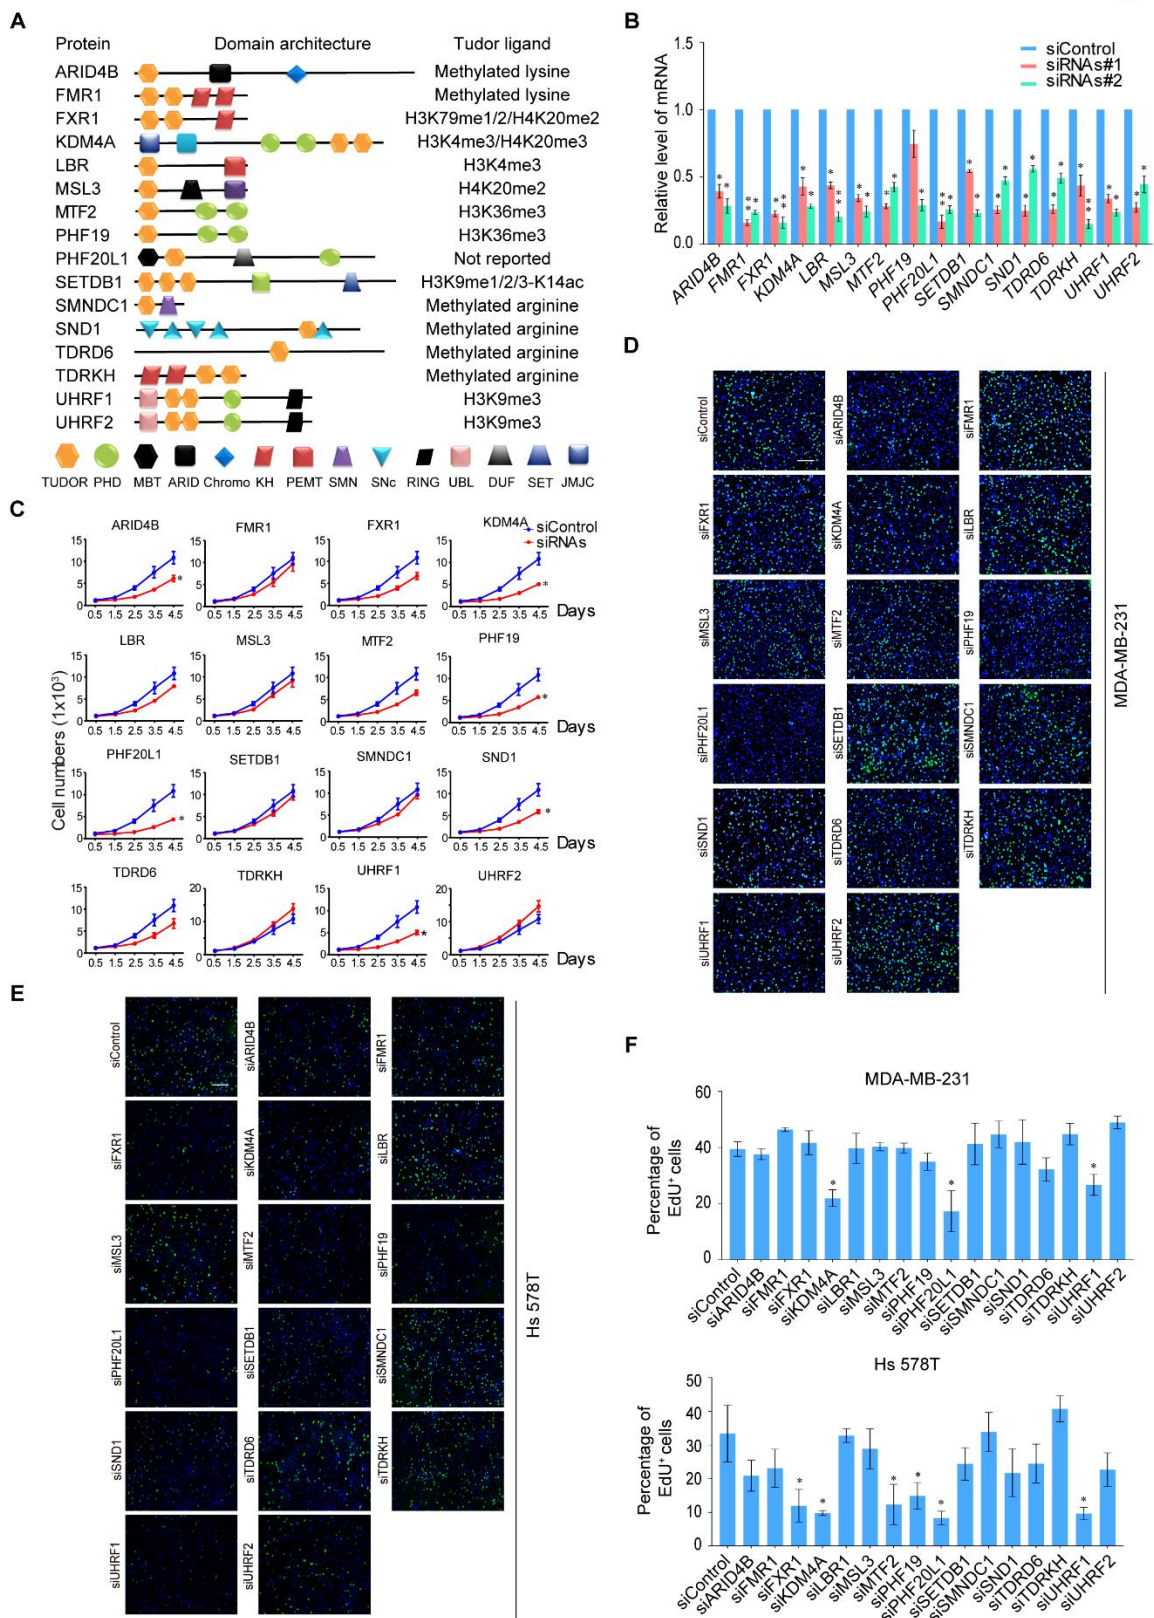

**Fig. S1. PHF20L1 is critical for breast cancer cell proliferation.** (A) Schematic representation of TDRDs and the TUDOR ligand involved. (B) The knockdown efficiency are measured by qRT-PCR in MDA-MB-231 cells. (C) Growth curve assays were performed in MDA-MB-231 cells transfected with siRNAs against the indicated TDRDs. The cell number was measured by Operetta CLS™ for biological triplicate experiments. Data represent the mean ± SD. Two-tailed unpaired t test, \* $p < 0.05$ , \*\* $p < 0.01$  at the final day. (D and E) EdU assays were performed in TDRDs-deficient MDA-MB-231 or Hs 578T cells. Representative images are shown. Scale bar, 50 μm. (F) Statistical analysis of EdU assays in TDRDs-deficient MDA-MB-231 cells (upper panel) or Hs 578T cells (lower panel) are shown. Data represent the mean ± SD. Two-tailed unpaired t test, \* $p < 0.05$ , \*\* $p < 0.01$  (B and F).

fig. S2

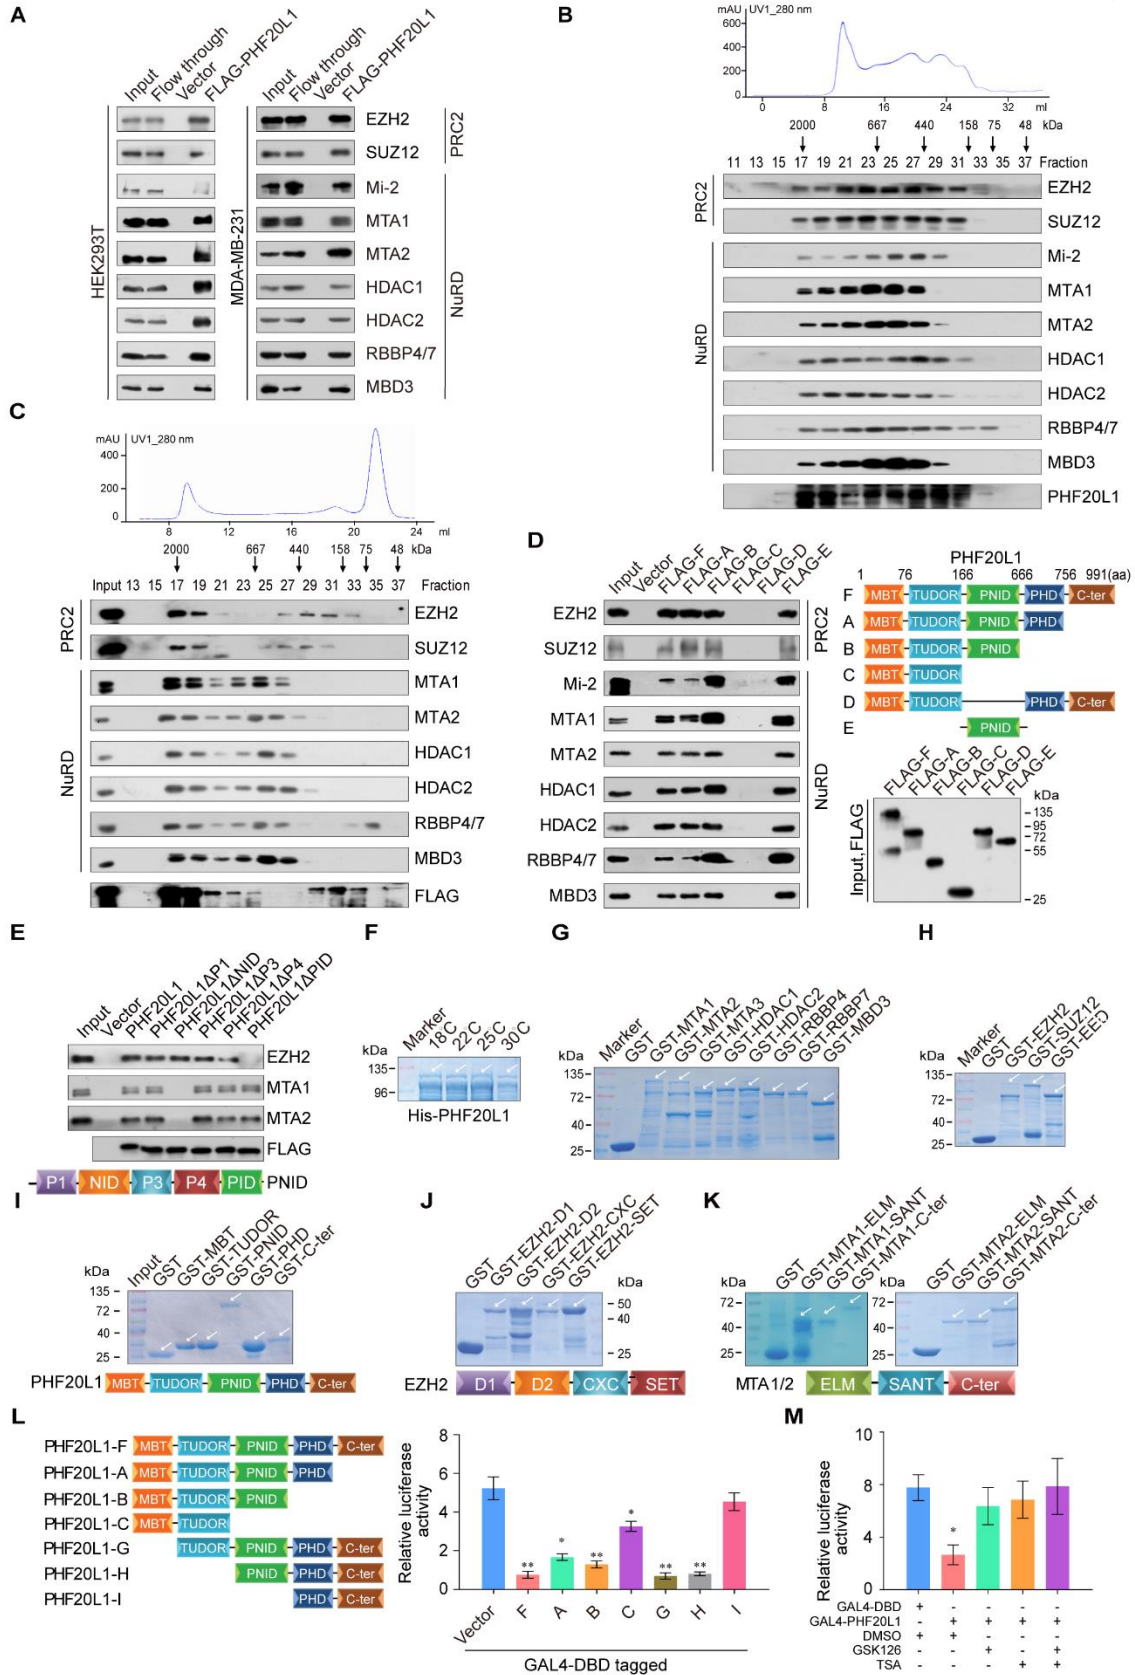

**Fig. S2. PHF20L1 is a transcriptional repressor that interacts with PRC2 and the NuRD complex.** (A) Column-bound proteins were analyzed using western blotting with antibodies against the indicated proteins, related to Fig. 3A. (B) Co-fractionation of PHF20L1, PRC2, and the NuRD complex by fast protein liquid chromatography. Nuclear extracts of HEK293T cells were fractionated on Superose 6 size exclusion columns. Chromatographic elution profiles and western blotting analysis of the chromatographic fractions are shown. (C) Co-fractionation of PHF20L1, PRC2, and the NuRD complex by fast protein liquid chromatography. FLAG-PHF20L1 multiprotein complexes were fractionated on Superose 6 size exclusion columns. Chromatographic elution profiles and western blotting analysis of the chromatographic fractions are shown. (D) Co-IP analysis of the molecular interaction between PRC2, NuRD and PHF20L1 with cellular lysates from HEK293T cells expressing FLAG-tagged full-length or deletions of PHF20L1. The conserved domains of PHF20L1 were divided into the MBT, TUDOR, PNID, PHD, and C-terminal domain. (E) Co-IP analysis of the molecular interaction between PNID domain and PRC2 or NuRD with cellular lysates from HEK293T cells expressing FLAG-tagged deletions of PHF20L1. The PNID domain of PHF20L1 were divided into P1, P2 (NID), P3, P4, and P5 (PID). (F-K) GST/His fused proteins purified from BL21 *Escherichia coli*. used in Fig. 3. (L) The PNID domain is responsible for the transcriptional repression activity of PHF20L1. HEK293T cells were transfected with the indicated Gal4-deletions and the Gal4 luciferase reporter activity was measured. (M) Effect of GSK126 and TSA treatment on PHF20L1 repressive activity. HEK293T cells were transfected as indicated constructs along with treatment of inhibitor against EZH2 or MTA1, and Gal4 luciferase reporter activity was measured. Data shown are mean  $\pm$  SD. Two-tailed unpaired t test. \* $p < 0.05$ , \*\* $p < 0.01$  (L and M).

fig. S3

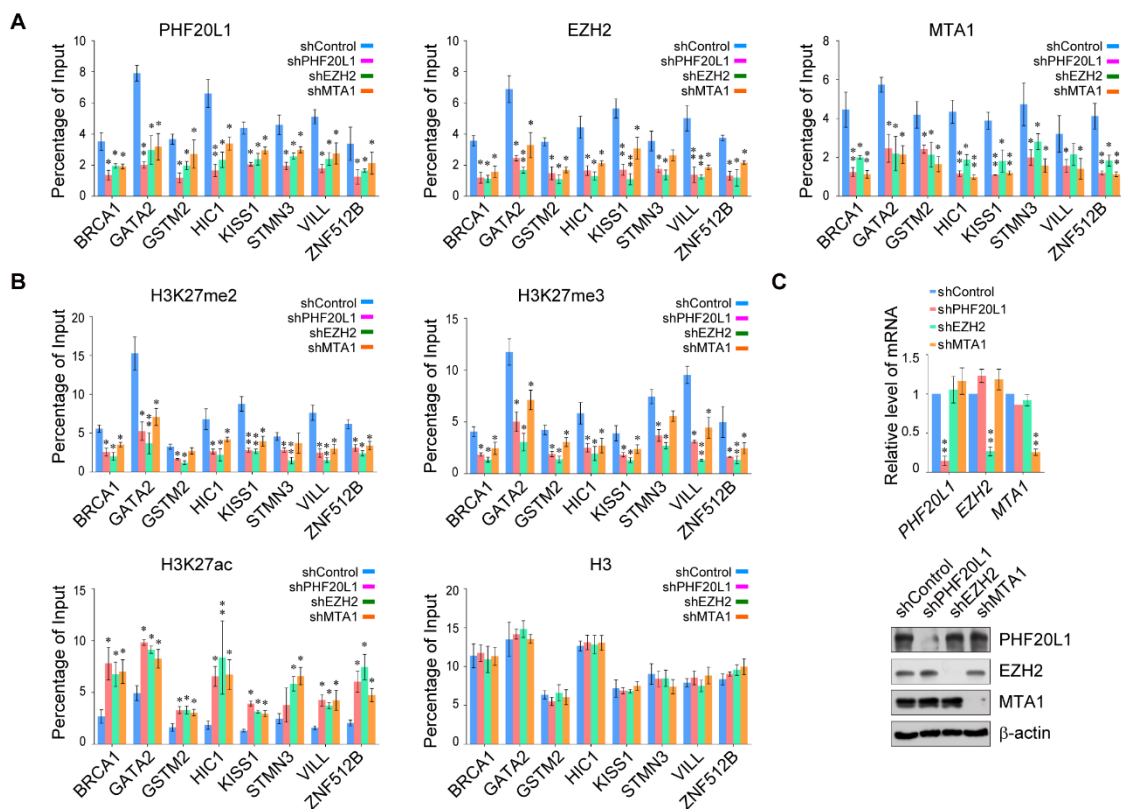

**Fig. S3. PHF20L1 loss-of-function impairs the deposition of PRC2 and the NuRD complex.** (A and B) qChIP analysis using anti-PHF20L1, anti-EZH2, anti-MTA1, anti-H3K27me2, anti-H3K27me3, anti-H3K27ac, and anti-H3 antibodies in control, PHF20L1 KD, EZH2 KD and MTA1 KD MDA-MB-231 cells. (C) The knockdown of PHF20L1 could not affect the expression of EZH2 and MTA1 in MDA-MB-231 cells. Data shown are mean  $\pm$  SD. Two-tailed unpaired t test, \* $p < 0.05$ , \*\* $p < 0.01$  (A-C).



fig. S4

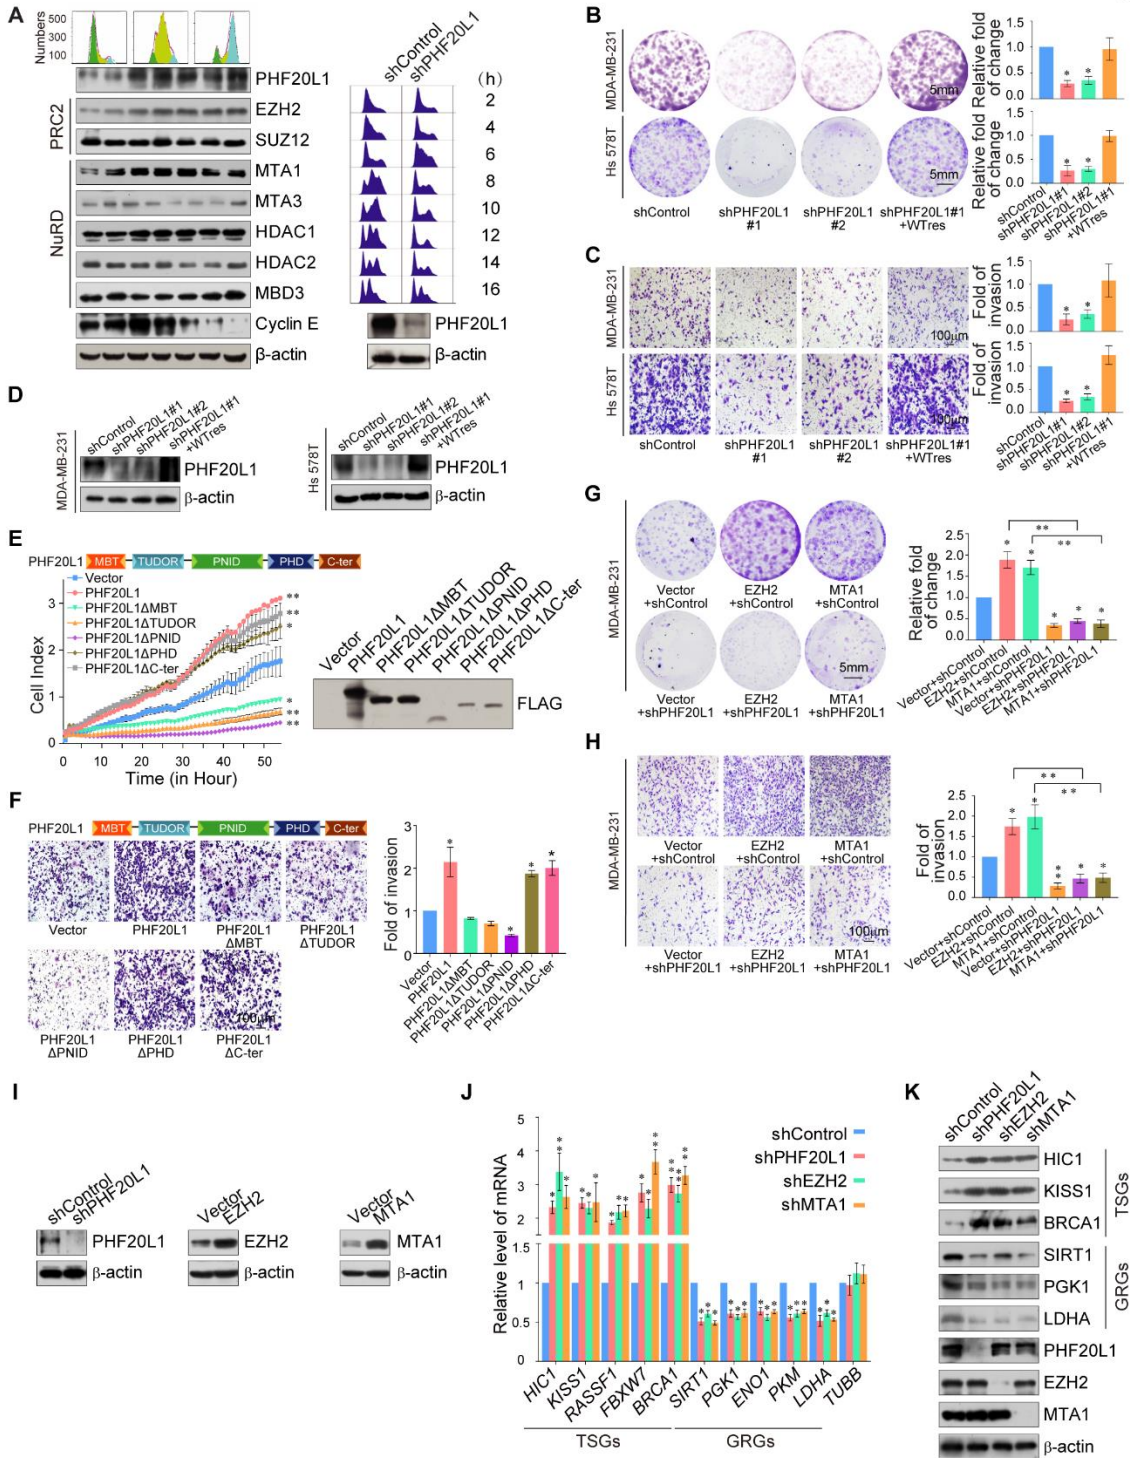

**Fig. S4. PHF20L1 acts in concert with its associated corepressor complexes to promote breast cancer carcinogenesis.** (A) Western blotting analysis of the expression of PHF20L1, PRC2, and NuRD subunits at different cell cycle stages (left panel). Propidium iodide FACS analysis of the cell cycle following PHF20L1 depletion in MDA-MB-231 cells are shown (right panel). (B) Colony formation assays were performed in control, PHF20L1 KD and PHF20L1 KD MDA-MB-231 or Hs 578T cells stably expressing shRNA-resistant PHF20L1 (WTres). (C) Transwell invasion assays were performed in cells as in (B). (D) Western blotting analysis of PHF20L1 in cells as in (B and C). (E) The growth curves were measured in MDA-MB-231 cells stably expressing vector, full-length PHF20L1 or deletion mutations of the MBT, TUDOR, PNID, PHD, and C-terminal domains. Data shown are mean  $\pm$  SD. Two-tailed unpaired t test, \* $p$  < 0.05, \*\* $p$  < 0.01 at the final minute. (F) Transwell invasion assays were performed in MDA-MB-231 cells as in (E). (G) MDA-MB-231 cells infected with lentiviruses carrying shControl, shPHF20L1, shControl + EZH2, shControl + MTA1, shPHF20L1 + EZH2, shPHF20L1 + MTA1, then colony formation assays were performed. (H) Transwell invasion assays were performed in cells as in (G). (I) Western blotting analysis of PHF20L1, EZH2 and MTA1 in cells as in (G and H). (J and K) The expression of the indicated tumor suppressor genes and glycolysis related genes were measured by qRT-PCR (J) and western blotting analysis (K) in control, PHF20L1 KD, EZH2 KD and MTA1 KD MDA-MB-231 cells. *TUBB* served as an irrelevant control gene. The mRNA levels were normalized to those of *ACTB*.  $\beta$ -actin served as loading control. All error bars represent mean  $\pm$  SD. Two-tailed unpaired t test. \* $p$  < 0.05, \*\* $p$  < 0.01 (B, C, F, G, H, and J).

fig. S5

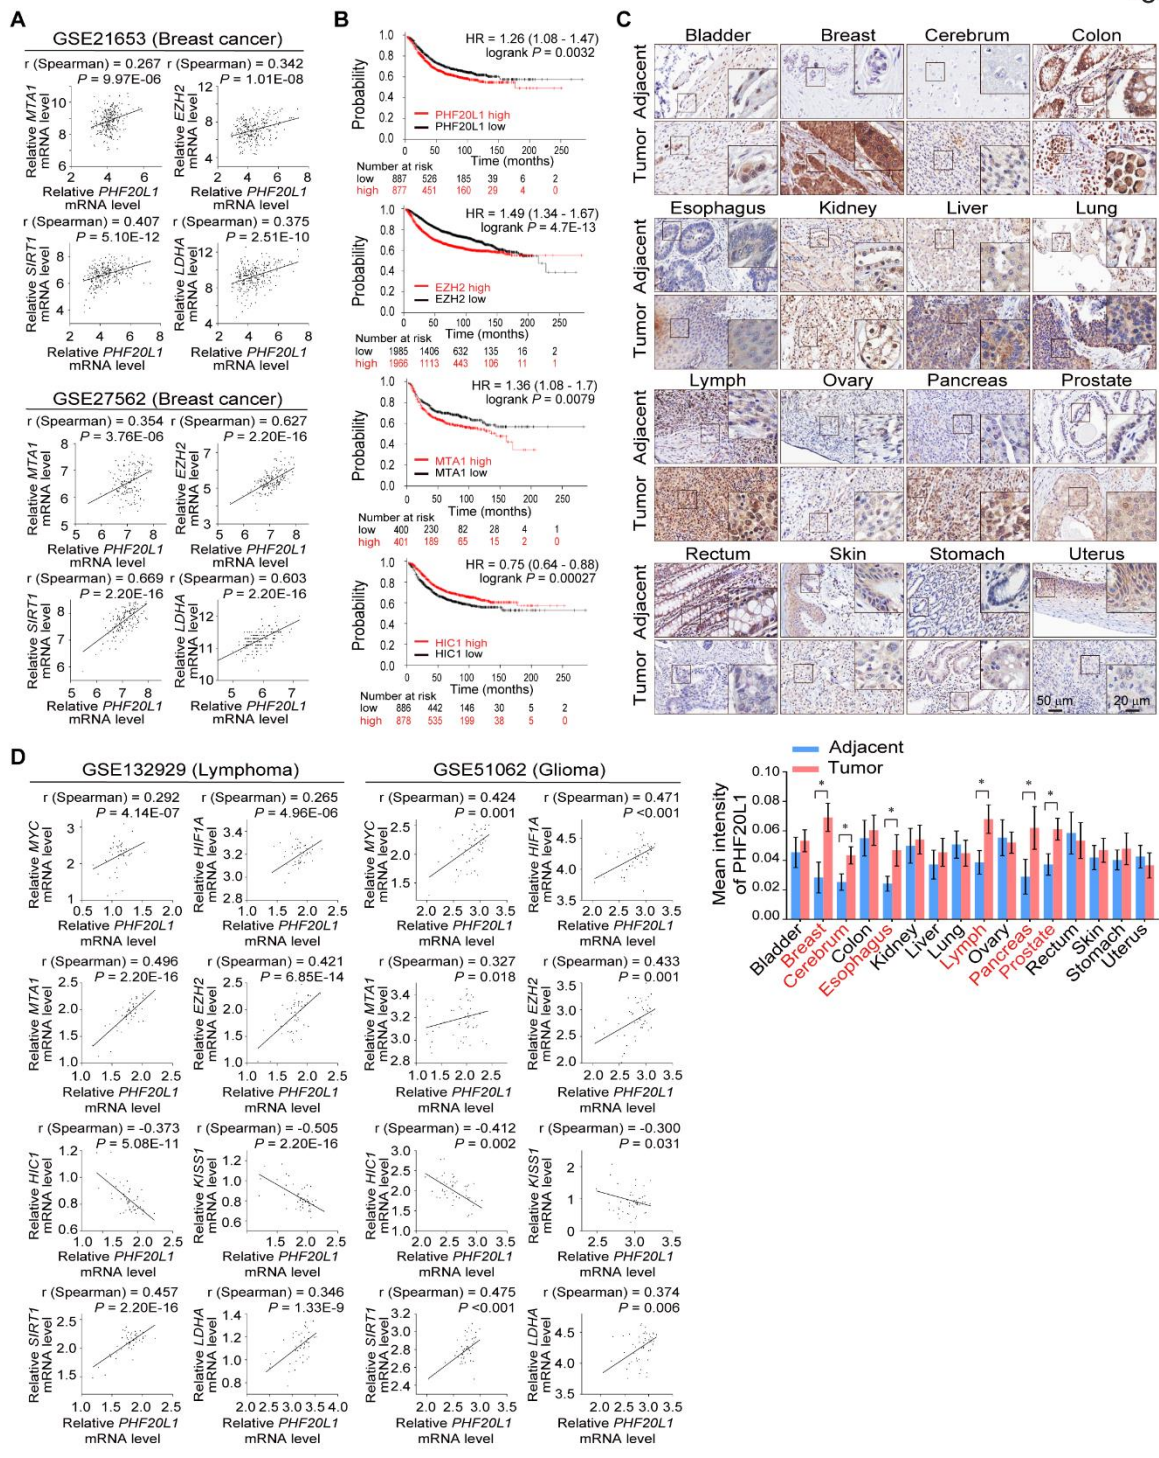



**Fig. S5. Clinical relevance of the MYC/HIF1 $\alpha$ -(PHF20L1-EZH2-MTA1)-HIC1/KISS1 axis in cancers.** (A) Analysis of public datasets (GSE21653 and GSE27562) from breast cancer for the correlation of *MTA1*, *EZH2*, *SIRT1*, *LDHA*, and *PHF20L1*, related to Fig. 5K. (B) Kaplan-Meier survival analysis for the relationship between survival time and expression levels of PHF20L1, EZH2, MTA1, and HIC1 in breast cancer using the online tool (<http://kmplot.com/analysis/>). (C) Immunohistochemical staining of PHF20L1 in paired samples of multiple carcinomas versus adjacent normal tissues and values for the stainings were determined by ImagePro Plus software and are presented with statistical histogram. Representative images of 200-fold magnifications of each type of paired tumor section are presented. Data shown are mean  $\pm$  SD. Two-tailed unpaired t test. \* $p < 0.05$ , \*\* $p < 0.01$ . (D) Analysis of two published clinical datasets (GSE132929 and GSE51062) from lymphoma and glioma for the correlation of MYC, HIF1A, MTA1, EZH2, HIC1, KISS1, SIRT1, LDHA, and PHF20L1.

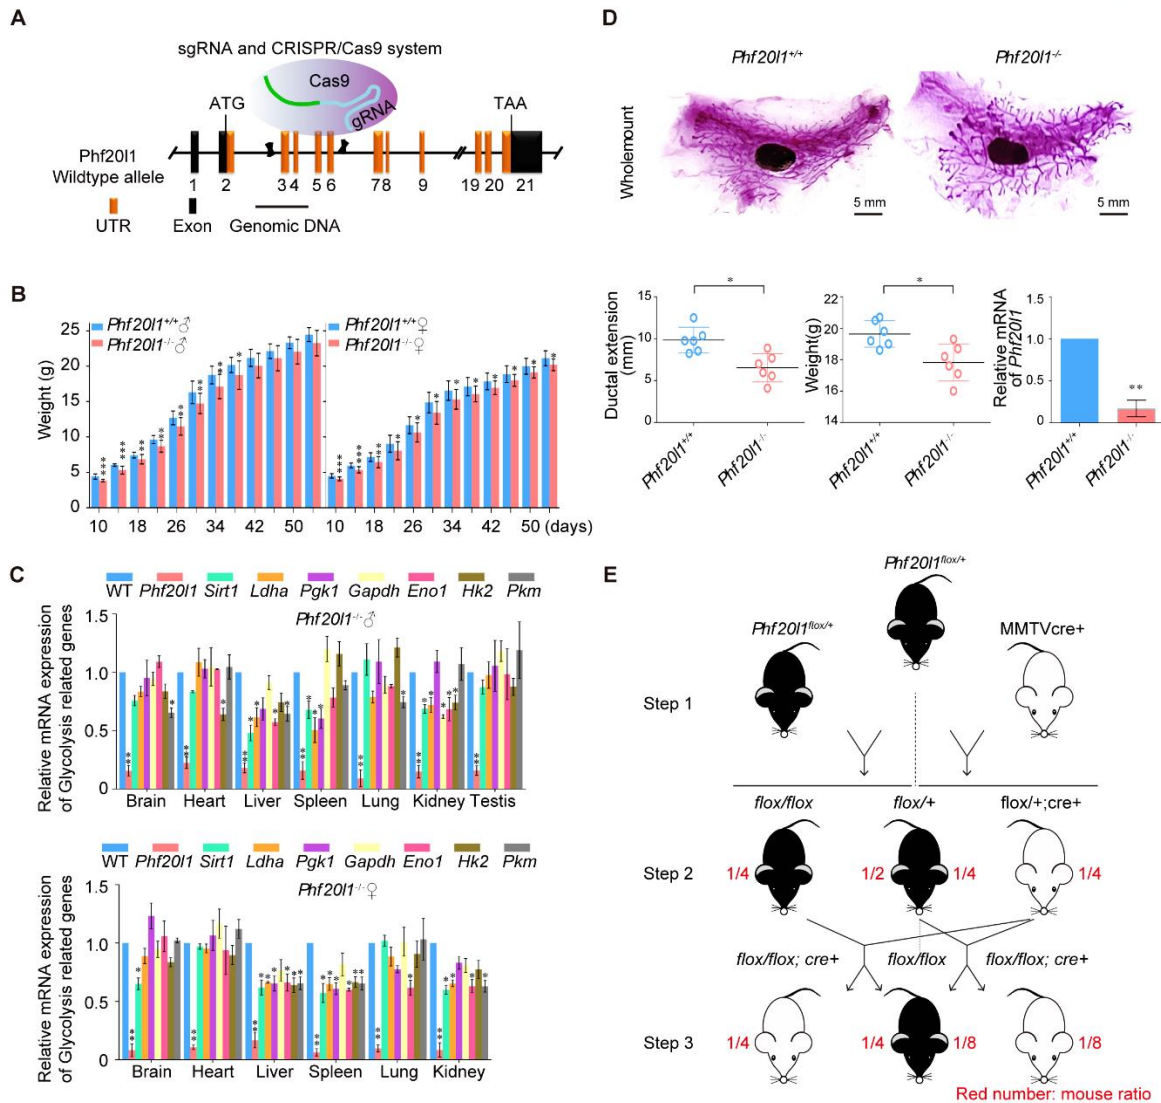

**Fig. S6. *Phf2011* deletion induces growth retardation and delay of mammary ductal outgrowth *in vivo*.** (A) Schematic of the depletion of the *Phf2011* gene using the CRISPR/Cas9 system. (B) Bodyweights of *Phf2011* KO and wild-type mice. n=15. (C) The expression profiles of glycolysis-related genes of various major organs in 4-week-old *Phf2011*-null mice or littermate wild-type mice. The expression levels of the indicated genes were measured by qRT-PCR. (D) Mammary ductal developmental defects in *Phf2011* knockout mice at about 8-week-old. (E) Strategy for the generation of *Phf2011*<sup>flox/flox</sup>; MMTV-Cre mice. All error bars represent mean  $\pm$  SD. Two-tailed unpaired t test, \* $p < 0.05$ , \*\* $p < 0.01$ , \*\*\* $p < 0.001$  (B-D).
